# Supplementary material for: Haploidentical versus Double-Cord Blood Stem Cells as a Second Transplantation for Relapsed Acute Myeloid Leukemia
Source: MDPI journal article supplement (doi:10.3390/cancers15020454), 2023-01-10
Supplement: s1 [file s1]

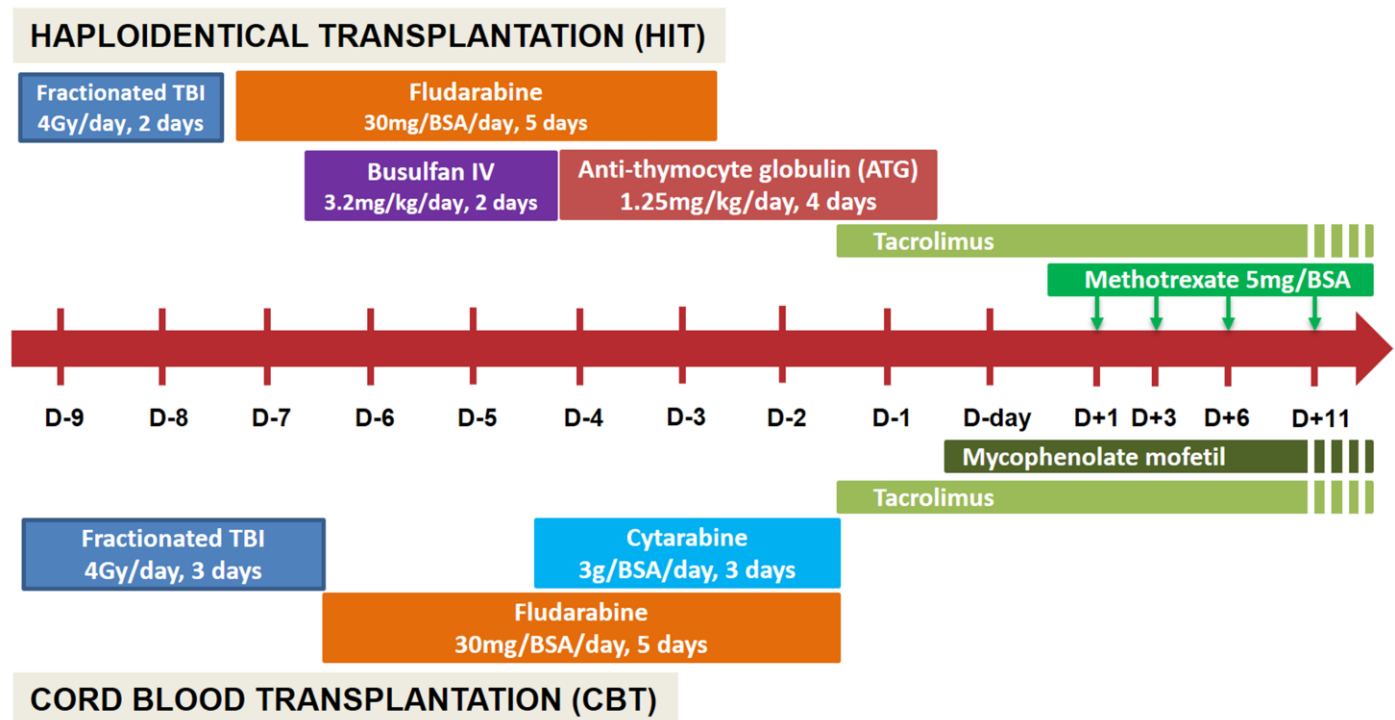

Figure S1. Conditioning scheme of haploidentical and cord blood transplantation

\* TBI dose of 400 cGy for was omitted for 6 frail patients (5 in HIT group; 3 with age over 55 years old, 1 with bronchiolitis obliterans from SCT1, 1 with clinician's discretion; 1 in CBT group with age over 55 years old)

Abbreviations: BSA: body surface area; Gy: Gray; IV; intravenous; TBI: total body irradiation

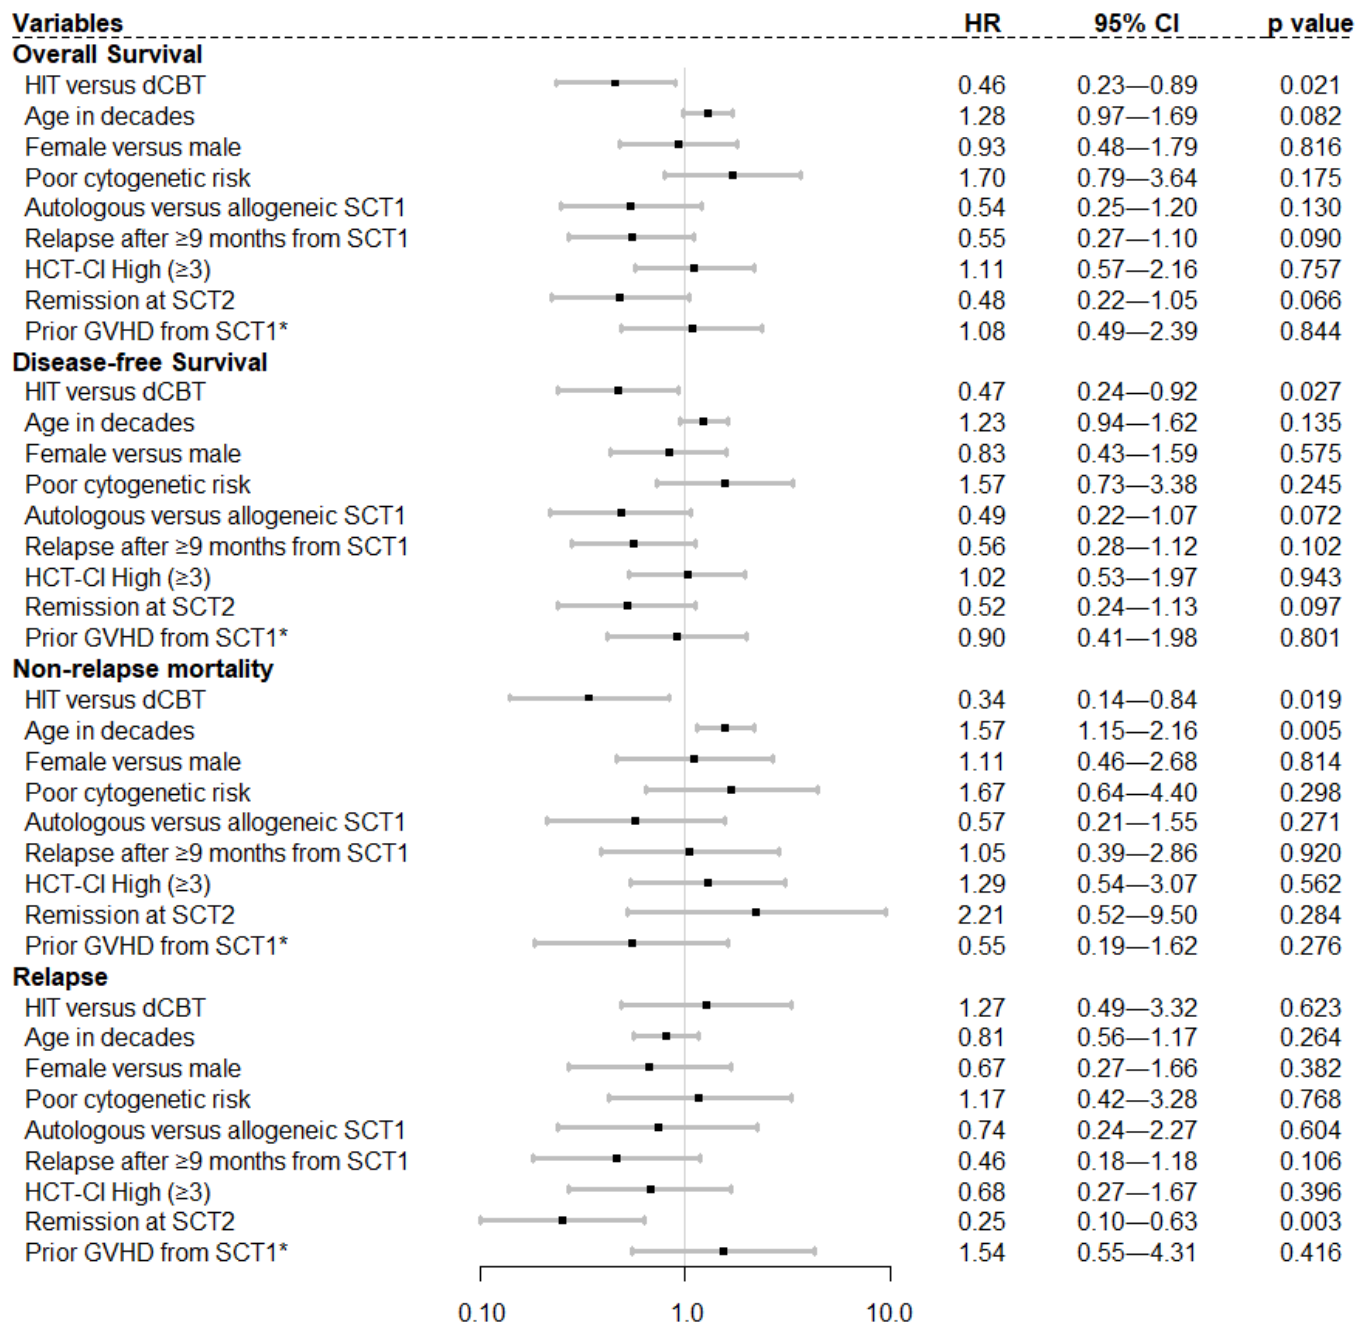

Figure S2. Univariate analysis for risk factors associated with SCT2 outcomes

Abbreviations: dCBT: double-cord blood transplantation; GVHD: graft-versus-host disease; HCT-CI: hemopoietic cell transplantation-specific comorbidity index; HIT: haploidentical donor transplant; SCT1: first stem cell transplantation; SCT2: second stem cell transplantation. \*History of either acute GVHD grade 2–4 or moderate to severe chronic GVHD

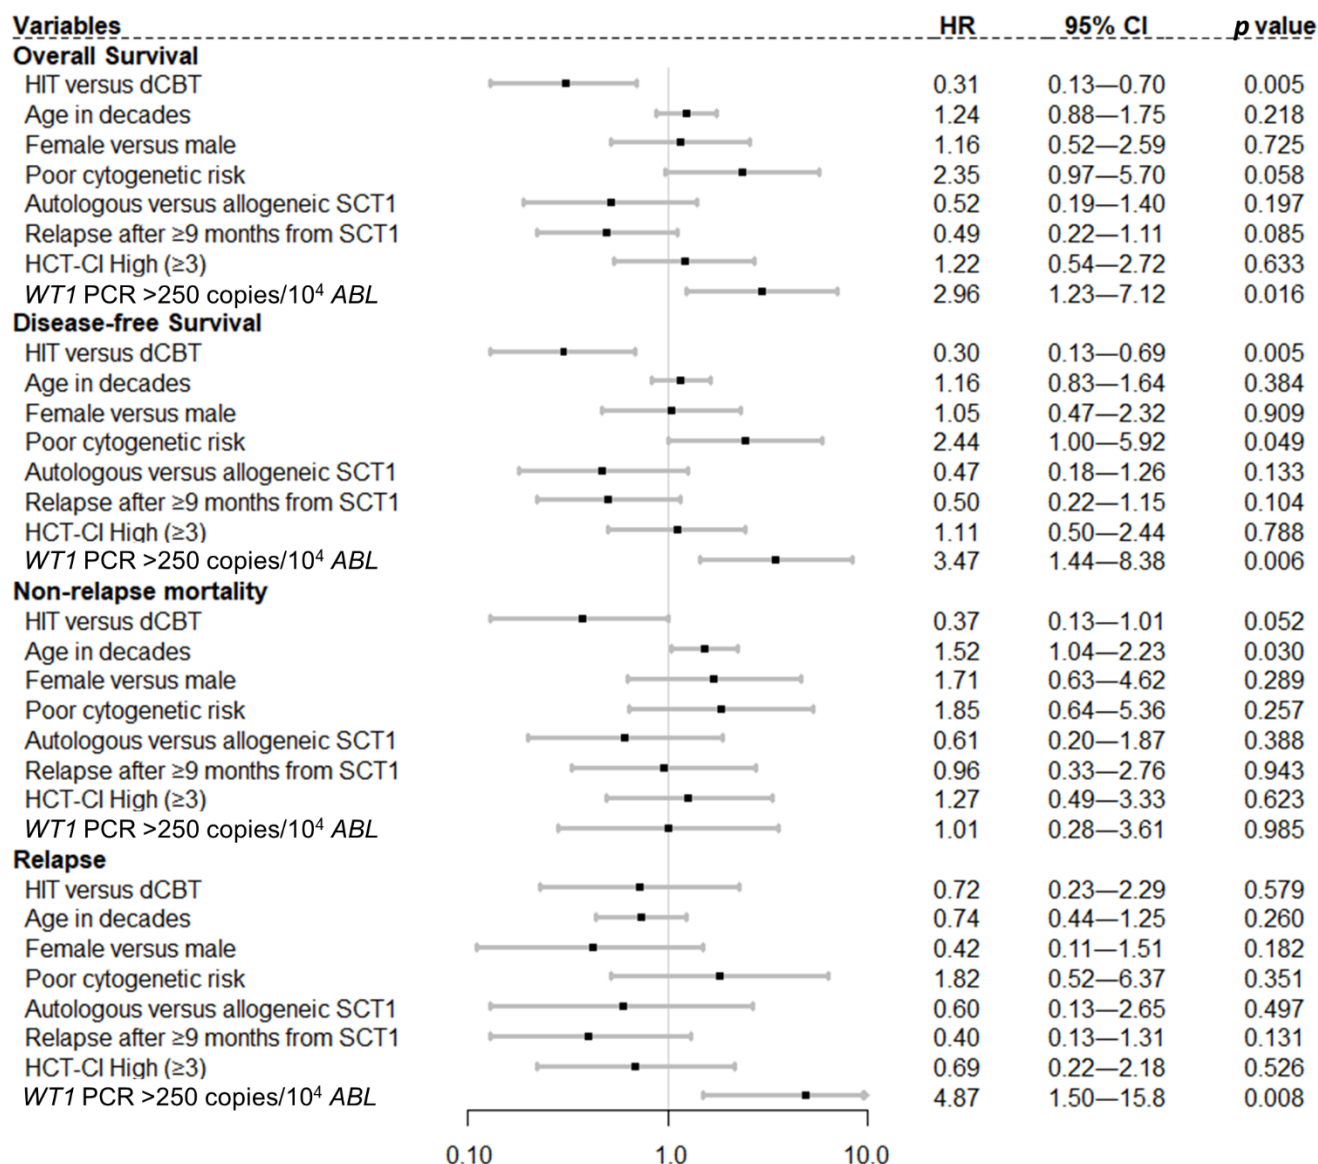

Figure S3. Univariate analysis for risk factors associated with SCT2 outcomes for patients in complete remission before SCT2 with available WT1-PCR ( $N = 38$ ).

Abbreviations: ABL: Abelson gene; CI: confidence interval; dCBT: double-cord blood transplantation; HCT-CI: hematopoietic cell transplantation-specific comorbidity index; HIT: haploidentical donor transplant; HR: hazard ratio; PCR: polymerase chain reaction; SCT1: first stem cell transplantation; SCT2: second stem cell transplantation; WT1: Wilms tumor 1 gene

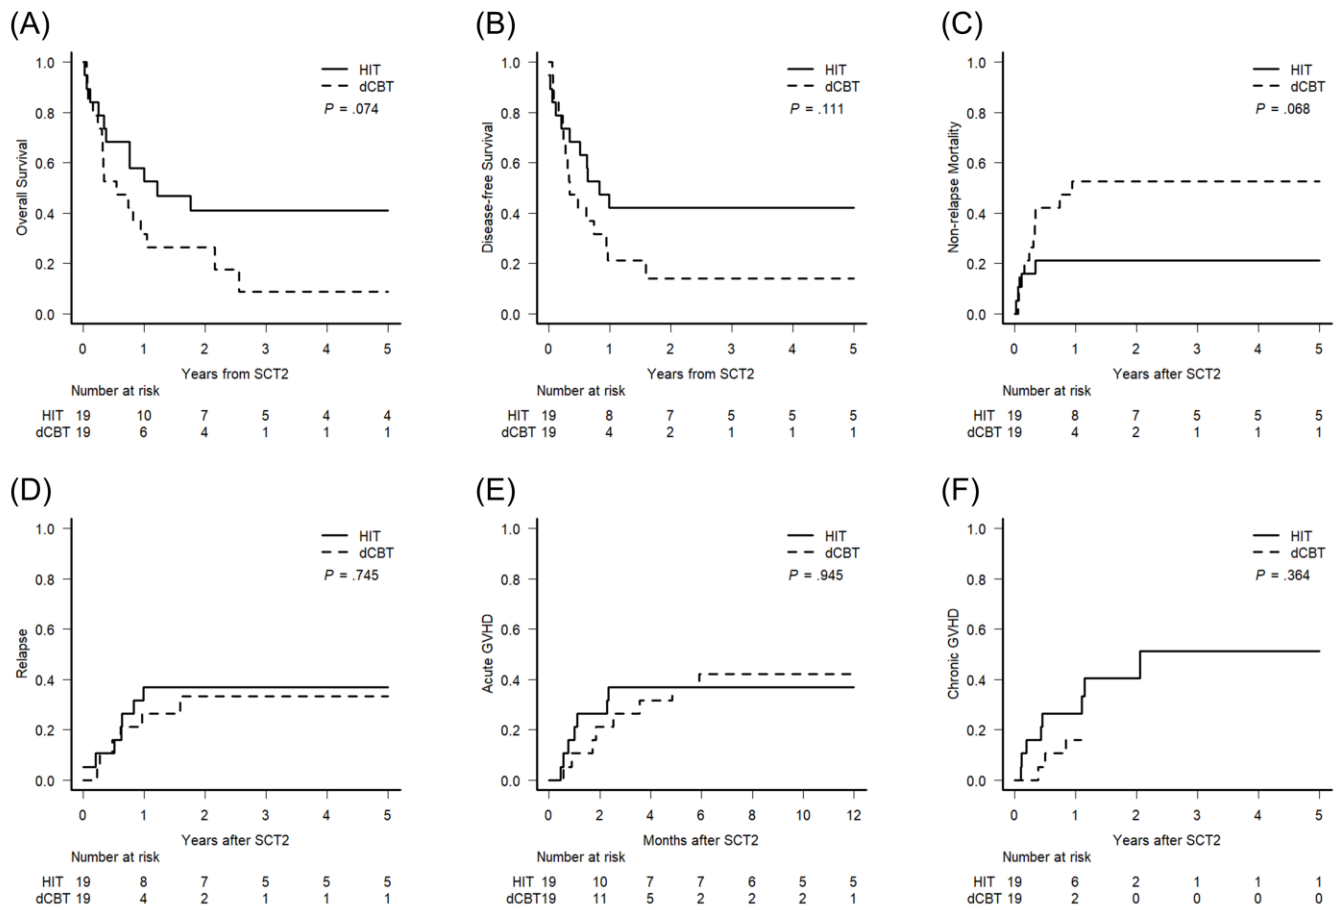

Figure S4. Transplant outcomes of subgroup of patients who received first transplant from allogeneic donor.

Abbreviations: dCBT: double-cord blood transplantation; GVHD: graft-versus-host disease; HIT: haploidentical donor transplant; SCT2: second stem cell transplantation

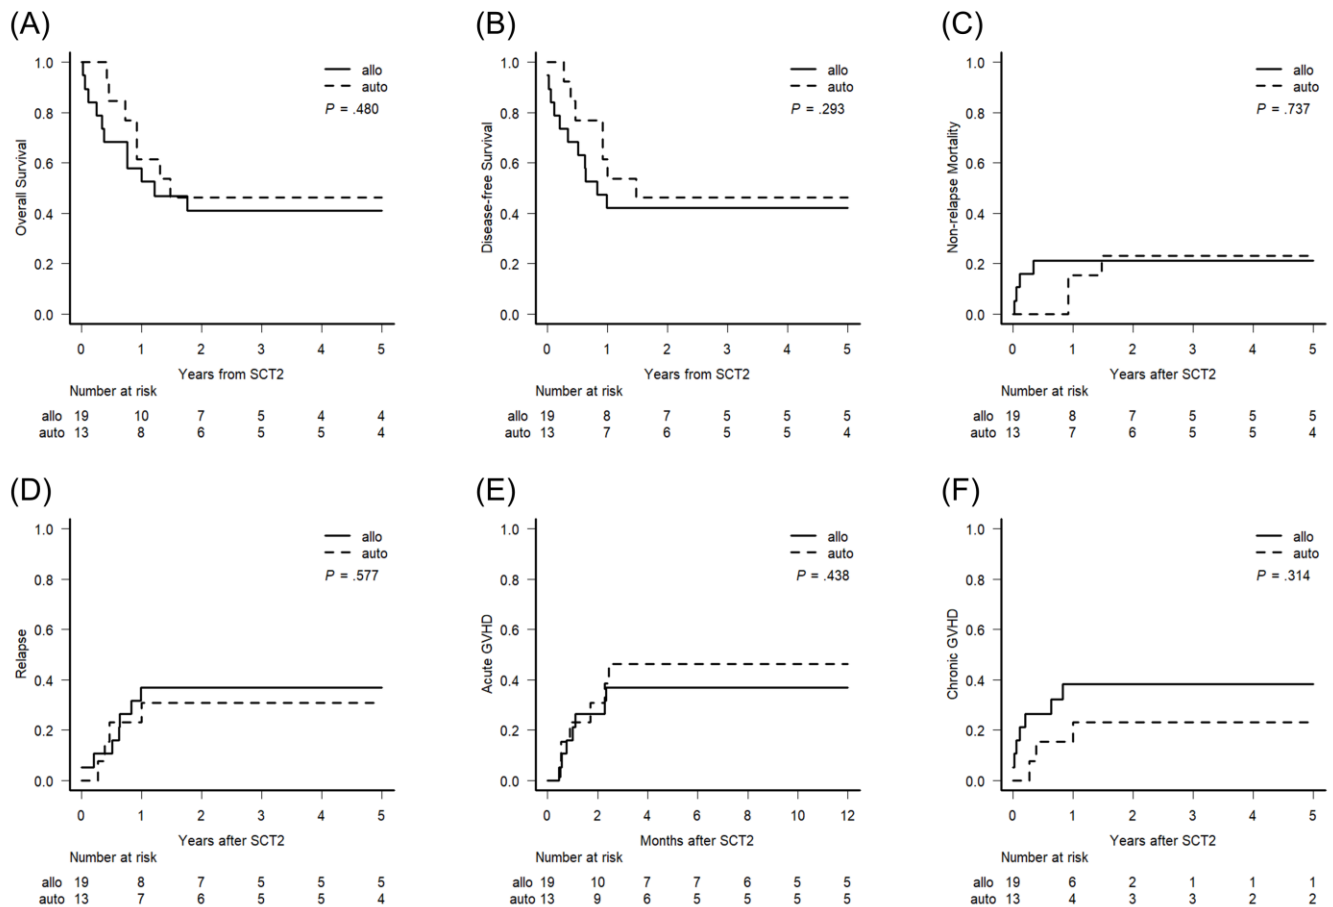

Figure S5. Transplant outcomes of subgroup of patients who received second stem cell transplant from haploidentical donor.

Abbreviations: allo: allogeneic stem cell transplantation; auto: autologous stem cell transplantation; GVHD: graft-versus-host disease; SCT2: second stem cell transplantation

Table S1. Complications after second transplantation

|                                     | <b>HIT</b> ( <i>N</i> = 32)<br><i>N</i> (%) | <b>dCBT</b> ( <i>N</i> = 20)<br><i>N</i> (%) | <i>p</i> value |
|-------------------------------------|---------------------------------------------|----------------------------------------------|----------------|
| CMV DNAemia (%)                     | 24 (75)                                     | 15 (75)                                      | 1.000          |
| CMV disease (%)                     | 5 (15)                                      | 4 (20)                                       | 0.719          |
| CMV treatment (%)                   | 19 (59)                                     | 12 (60)                                      | 1.000          |
| Hemorrhagic cystitis (%)            | 10 (31)                                     | 1 (5)                                        | 0.035          |
| Thrombotic microangiopathy (%)      | 2 (6)                                       | 1 (5)                                        | 1.000          |
| Sinusoidal obstruction syndrome (%) | 2 (6)                                       | 0 (0)                                        | 0.517          |
| Herpes zoster infection (%)         | 7 (22)                                      | 4 (20)                                       | 1.000          |

Abbreviations: dCBT: double cord blood transplantation; CMV: cytomegalovirus; HIT: haploidentical transplantation

Table S2. Causes of non-relapse mortality (NRM)

|                                       | <b>HIT</b> ( <i>N</i> = 32)<br><i>N</i> (%) | <b>dCBT</b> ( <i>N</i> = 20)<br><i>N</i> (%) | <i>p</i> value |
|---------------------------------------|---------------------------------------------|----------------------------------------------|----------------|
| Early NRM (<100 days from transplant) | 3 (9)                                       | 5 (25)                                       | 0.235          |
| Infection                             | 2 (6)                                       | 4 (20)                                       | 0.189          |
| SOS                                   | 1 (3)                                       | 0 (0)                                        | 1.000          |
| Diffuse alveolar hemorrhage           | 0 (0)                                       | 1 (5)                                        | 1.000          |
| Transplantation-related (%)           |                                             |                                              |                |
| Death in aplasia                      | 1 (3)                                       | 2 (10)                                       | 0.551          |
| Chronic GVHD                          | 3 (9)                                       | 1 (5)                                        | 1.000          |
| Hemorrhage                            | 0 (0)                                       | 1 (5)                                        | 0.385          |
| SOS                                   | 1 (3)                                       | 0 (0)                                        | 1.000          |
| Infection                             | 5 (16)                                      | 7 (35)                                       | 0.175          |
| Lower respiratory infection           | 4 (13)                                      | 4 (20)                                       | 0.695          |
| CNS infection                         | 0 (0)                                       | 1 (5)                                        | 0.385          |
| Bacterial sepsis                      | 1 (3)                                       | 2 (10)                                       | 0.551          |
| Other                                 | 0 (0)                                       | 1 (5) <sup>†</sup>                           | 0.385          |

Abbreviations: CNS: Central nervous system; dCBT: double cord blood transplantation; GVHD: graft-versus-host disease; HIT: haploidentical transplantation; SOS: sinusoidal obstruction syndrome

<sup>†</sup> myelopathy of unidentified cause

Table S3. Comparison of outcomes after second haploidentical transplantation for relapsed AML

| Reference                                           | Study type                                                               | N   | Disease type<br>N (%)                                      | Donor of SCT1<br>N (%)                                                                | Months from<br>SCT1 to relapse<br>median (range) | GVHD before<br>SCT2                                          | Salvage therapy<br>N (%)                 | CR at<br>SCT2<br>N (%) | Regimen<br>intensity                | Cell<br>source      | GVHD<br>prophylaxis                | Outcomes                                                                | GVHD incidence                                               |
|-----------------------------------------------------|--------------------------------------------------------------------------|-----|------------------------------------------------------------|---------------------------------------------------------------------------------------|--------------------------------------------------|--------------------------------------------------------------|------------------------------------------|------------------------|-------------------------------------|---------------------|------------------------------------|-------------------------------------------------------------------------|--------------------------------------------------------------|
| Tischer et al.<br>BMT, 2014 <sup>1</sup>            | Retrospective,<br>two centers<br>(Germany)                               | 20  | AML 15 (75)<br>ALL 4 (20)<br>AL,<br>bi-phenotypic<br>1 (5) | MRD 6 (30)<br>MMRD 2 (10)<br>MUD 12 (60)                                              | 11 (1-54)                                        | Not available                                                | Cytoreduction<br>17 (85)<br>none 3 (15)  | 3 (15)                 | RIC = 20                            | PB = 6<br>BM = 14   | PTCy<br>FK, MMF                    | 1y-OS: 45%<br><br>1y-DFS: 33%<br><br>Relapse 7/20<br><br>1y-NRM: 36%    | aGVHD: 12/20<br><br>cGVHD: 5/20                              |
| Srouf et al.<br>AJH. 2020 <sup>2</sup>              | Retrospective,<br>single center<br>(MDACC)                               | 29  | AML 20 (70)<br>MDS 3 (10)<br>ALL 4 (14)<br>HD 2 (7)        | MRD 7 (24)<br>MUD 10 (35)<br>Haplo 3 (10)<br>MMUD 2 (7)<br>CB 6 (21)<br>missing 1 (4) | 9 (3-44)                                         | Not available                                                | Not available                            | 7 (24)                 | MAC = 15<br>RIC = 14                | PB = 9<br>BM = 20   | PTCy<br>FK, MMF                    | 3y-OS: 40%<br><br>3y-DFS: 31%<br><br>3y-Relapse: 30%<br><br>3y-NRM: 39% | aGVHD(100d):<br>45%<br><br>cGVHD(1 year):<br>7.2%            |
| Kharfan-<br>Dabaja et al.<br>BJH. 2021 <sup>3</sup> | Retrospective,<br>registry<br>(EBMT)                                     | 135 | AML 135 (100)                                              | Same donor 9 (7)<br>Different donor<br>125 (93)<br>missing 1 (4)                      | 11 (1-89)                                        | aGVHD Gr 2-4:<br>10%<br><br>cGVHD (any):<br>15%              | Not available                            | 61 (45)                | MAC = 62<br>RIC = 72<br>missing = 1 | PB = 29<br>BM = 106 | PTCy<br>otherwise not<br>specified | 2y-OS: 29%<br><br>2y-DFS: 29%<br><br>2y-Relapse: 48%<br><br>2y-NRM: 27% | aGVHD(180d, Gr<br>2-4):<br>27%<br><br>cGVHD (2 year):<br>22% |
| Current study                                       | Retrospective,<br>single center<br><br>(Seoul St.<br>Mary's<br>Hospital) | 32  | AML 32 (100)                                               | Auto 13 (41)<br>MRD 11 (34)<br>MUD 7 (22)<br>CB 1 (3)                                 | 12 (3-137)                                       | aGVHD Gr 2-4:<br>9%<br><br>cGVHD (moderate<br>or severe): 9% | Intensive 30 (94)<br>Non-intensive 2 (6) | 25 (78)                | RTC = 32                            | PB = 32             | ATG<br>FK, MTX                     | 2y-OS: 43%<br><br>2y-DFS: 44%<br><br>2y-Relapse: 34%<br><br>2y-NRM: 22% | aGVHD(180d):<br>41%<br><br>cGVHD (2 year):<br>46%            |

Table S3. Comparison of outcomes after second haploidentical transplantation for relapsed AML (continued)

| Reference                                       | Study type                                                            | N   | Factors associated with poor outcomes                                                              |                                                                                   |                                                                                                                     |                                                     |
|-------------------------------------------------|-----------------------------------------------------------------------|-----|----------------------------------------------------------------------------------------------------|-----------------------------------------------------------------------------------|---------------------------------------------------------------------------------------------------------------------|-----------------------------------------------------|
|                                                 |                                                                       |     | OS                                                                                                 | DFS                                                                               | Relapse                                                                                                             | NRM                                                 |
| Tischer et al.<br>BMT, 2014 <sup>1</sup>        | Retrospective,<br>two centers<br><br>(Germany)                        | 20  | Duration of remission after SCT1<br>(≤ 6 months)                                                   | -                                                                                 | -                                                                                                                   | -                                                   |
| Srouf et al.<br>AJH. 2020 <sup>2</sup>          | Retrospective,<br>single center<br><br>(MDACC)                        | 29  | HCT-CI ≥ 3<br><br>DSA                                                                              | HCT-CI ≥ 3<br><br>DSA                                                             | Duration of remission after SCT1<br>(≤ 6 months)                                                                    | HCT-CI ≥ 3<br><br>DSA                               |
| Kharfan-Dabaja et al.<br>BJH. 2021 <sup>3</sup> | Retrospective,<br>registry<br><br>(EBMT)                              | 135 | Active disease (vs CR)<br><br>Older age<br><br>Duration of remission after SCT1<br>(≤ 13.2 months) | Active disease (vs CR)<br><br>Duration of remission after SCT1<br>(≤ 13.2 months) | Active disease (vs CR)<br><br>Duration of remission after SCT1<br>(≤ 13.2 months)<br><br>Patient CMV seropositivity | Duration of remission after SCT1<br>(≤ 13.2 months) |
| Current study                                   | Retrospective,<br>single center<br><br>(Seoul St. Mary's<br>Hospital) | 32  | Older age                                                                                          | -                                                                                 | Duration of remission after SCT1<br>(≤ 9 months)<br><br>Active disease (vs CR)                                      | Older age                                           |

Abbreviations: AJH: American Journal of Hematology; aGVHD: acute graft-versus-host disease; AL: acute leukemia; ALL: acute lymphoblastic leukemia; AML: acute myeloid leukemia; ATG: antithymocyte globulin rabbit (Thymoglobuline®); BJH: British Journal of Haematology; BMT: Bone Marrow Transplantation; cGVHD: chronic graft-versus-host disease; CMV: cytomegalovirus; CR: complete remission; DFS: disease-free survival; DSA, donor-specific anti-HLA antibodies; EBMT: The European Society for Blood and Marrow Transplantation; FK: tacrolimus; Gr: grade; HCT-CI, hematopoietic cell transplant-comorbidity index; HD: Hodgkin disease; HIT: haploidentical transplantation; MAC: myeloablative conditioning; MDACC: MD Anderson Cancer Center; MDS: Myelodysplastic syndrome; MMF: mycophenolate mofetil; MTX: methotrexate; NRM: non-relapse mortality; OS: overall survival; PTCy: post-transplant cyclophosphamide; RIC: reduced intensity conditioning; RTC: reduced toxicity conditioning; SCT1: first stem cell transplantation; SCT2: second stem cell transplantation

1. Tischer J, Engel N, Fritsch S, et al. Second haematopoietic SCT using HLA-haploidentical donors in patients with relapse of acute leukaemia after a first allogeneic transplantation. *Bone Marrow Transplant*. 2014;49(7):895-901.
2. Srouf SA, Kongtim P, Rondon G, et al. Haploidentical transplants for patients with relapse after the first allograft. *Am J Hematol*. 2020.
3. Kharfan-Dabaja MA, Labopin M, Brissot E, et al. Second allogeneic haematopoietic cell transplantation using HLA-matched unrelated versus T-cell replete haploidentical donor and survival in relapsed acute myeloid leukaemia. *Br J Haematol*. 2021;193(3):592-601.

Table S4. Characteristics of patients who received first transplant from allogeneic donor

| Characteristics                                            |                       | HIT (N = 19), N (%) | dCBT (N = 19), N (%) | p value |
|------------------------------------------------------------|-----------------------|---------------------|----------------------|---------|
| AML MRC                                                    |                       | 3 (16)              | 4 (21)               | 1.000   |
| Age at SCT2, median (range)                                |                       | 47 (24-67)          | 47 (25-63)           | 0.942   |
| Male                                                       |                       | 10 (53)             | 12 (63)              | 0.743   |
| Cytogenetics <sup>a</sup>                                  | Favorable             | 0 (0)               | 3 (16)               | 0.038   |
|                                                            | Intermediate          | 17 (89)             | 10 (53)              |         |
|                                                            | Adverse               | 2 (11)              | 6 (32)               |         |
| FLT3-ITD                                                   | Positive              | 3 (16)              | 3 (15)               | 0.511   |
|                                                            | Negative              | 10 (53)             | 14 (70)              |         |
|                                                            | Not available         | 6 (32)              | 3 (15)               |         |
| Donor at SCT1                                              | Matched-related       | 11 (58)             | 4 (21)               | <0.001  |
|                                                            | Matched-unrelated     | 7 (37)              | 2 (11)               |         |
|                                                            | Haploidentical        | 0 (0)               | 13 (68)              |         |
|                                                            | Cord blood            | 1 (5)               | 0 (0)                |         |
| SCT1 Intensity                                             | MAC                   | 12 (63)             | 4 (21)               | 0.010   |
|                                                            | RTC <sup>b</sup>      | 3 (16)              | 12 (63)              |         |
|                                                            | RIC                   | 4 (21)              | 3 (16)               |         |
| GVHD post-SCT1                                             | aGVHD grade $\geq 2$  | 3 (16)              | 4 (21)               | 1.000   |
|                                                            | cGVHD $\geq$ moderate | 3 (16)              | 6 (32)               | 0.447   |
| Remission duration after SCT1 $\geq 9$ months              |                       | 14 (74)             | 13 (68)              | 1.000   |
| Salvage therapy                                            | Intensive             | 17 (89)             | 17 (89)              | 1.000   |
|                                                            | Non-intensive         | 2 (11)              | 2 (11)               | 0.486   |
|                                                            | With DLI              | 2 (11)              | 0 (0)                |         |
| Complete remission before SCT2                             |                       | 15 (79)             | 16 (84)              | 1.000   |
| WT1 PCR (/10 <sup>4</sup> ABL) before SCT2                 |                       |                     |                      | 1.000   |
| CR, $\geq 250$ (MRD-positive)                              |                       | 3 (16)              | 3 (16)               |         |
| CR, $< 250$ (MRD-negative)                                 |                       | 11 (58)             | 12 (63)              |         |
| CR, but data unavailable                                   |                       | 1 (5)               | 1 (5)                |         |
| Non-CR                                                     |                       | 4 (21)              | 3 (16)               |         |
| HCT-CI                                                     | 0                     | 0 (0)               | 5 (26)               | 0.007   |
|                                                            | 1-2                   | 9 (47)              | 2 (11)               |         |
|                                                            | $\geq 3$              | 10 (53)             | 12 (63)              |         |
| Donor sex                                                  | Match                 | 8 (42)              | 3 (16)               |         |
|                                                            | Partial mismatch      | -                   | 11 (58)              |         |
|                                                            | Full mismatch         | 11 (58)             | 5 (26)               |         |
| Donor HLA match (of eight loci, the lower value in dCBT)   | 4                     | 8 (42)              | 3 (16)               | <0.001  |
|                                                            | 5                     | 7 (37)              | 7 (37)               |         |
|                                                            | 6                     | 4 (21)              | 6 (32)               |         |
|                                                            | $\geq 7$              | 0 (0)               | 3 (16)               |         |
| Total nucleated cells, median (range), 10 <sup>8</sup> /kg |                       | 20.1 (9.2-40.3)     | 0.39 (0.18-0.71)     | <0.001  |
| CD34, median (range), 10 <sup>6</sup> /kg                  |                       | 8.86 (4.37-28.96)   | 0.07 (0.03-0.32)     | <0.001  |
| Time between SCT1 and SCT2, median months (range)          |                       | 17.5 (6.6-127.3)    | 15.4 (6.6-82.0)      | 0.280   |
| Time between relapse and SCT2, median months (range)       |                       | 3.7 (2.8-7.9)       | 3.7 (2.8-7.1)        | 0.977   |

Abbreviations: AML: acute myeloid leukemia; CR: complete remission; dCBT: double-cord blood transplantation; DLI: donor lymphocyte infusion; FLT3-ITD: fms-related tyrosine kinase 3-internal tandem duplication; GVHD: graft-versus-host disease; HCT-CI: hematopoietic cell transplantation-specific comorbidity index; HIT: haploidentical donor transplant; HLA: human leukocyte antigen; MAC: myeloablative conditioning; MRC: myelodysplasia-related changes; PCR: polymerase chain reaction; RIC: reduced-intensity conditioning; RTC: reduced-toxicity conditioning; SCT1: first stem cell transplantation; SCT2: second stem cell transplantation; TNC: total nucleated cells. <sup>a</sup>Cytogenetic classification was based on the International Working Group (IWG) response criteria for acute myeloid leukemia, published in 2003. <sup>b</sup>Reduced toxicity conditioning refers to fractionated TBI (8.0 Gy), fludarabine (150 mg/m<sup>2</sup>), and intravenous busulfan (6.4 mg/kg).
